# Supplementary material for: Medial prefrontal cortical thinning mediates shifts in other-regarding preferences during adolescence
Source: PubMed Central journal article supplement (PMC5561198; doi:10.1038/s41598-017-08692-6), 2017-08-17
Supplement: 41598_2017_8692_MOESM1_ESM.pdf [file 41598_2017_8692_MOESM1_ESM.pdf]

**Supplemental Information**  
for  
**Medial prefrontal cortical thinning mediates shifts in other-regarding preferences during adolescence**

Sunhae Sul<sup>1</sup>, Berna Güroğlu<sup>2,3</sup>, Eveline A. Crone<sup>2,3</sup>, Luke J. Chang<sup>4\*</sup>

<sup>1</sup>Department of Psychology  
Pusan National University  
Busan, Republic of Korea

<sup>2</sup>Developmental and Educational Psychology Unit  
Leiden University  
Leiden, The Netherlands

<sup>3</sup>Leiden Institute for Brain and Cognition  
Leiden University Medical Centre  
Leiden, The Netherlands

<sup>4</sup>Department of Psychological and Brain Sciences  
Dartmouth College  
Hanover, NH

**Figure S1.** Changes in cortical thickness associated with age. (A) Cortical thickness maps correlated with age with uncorrected statistical threshold of  $p < 0.005$ . (B) Cortical thickness maps correlated with age with significant clusters after correcting for multiple comparison using Monte-Carlo simulation. (C) Overlap between the regions correlated with age and the reciprocity index. Brain figure created using Connectome Workbench software (<http://www.humanconnectome.org/software/connectome-workbench.html>).

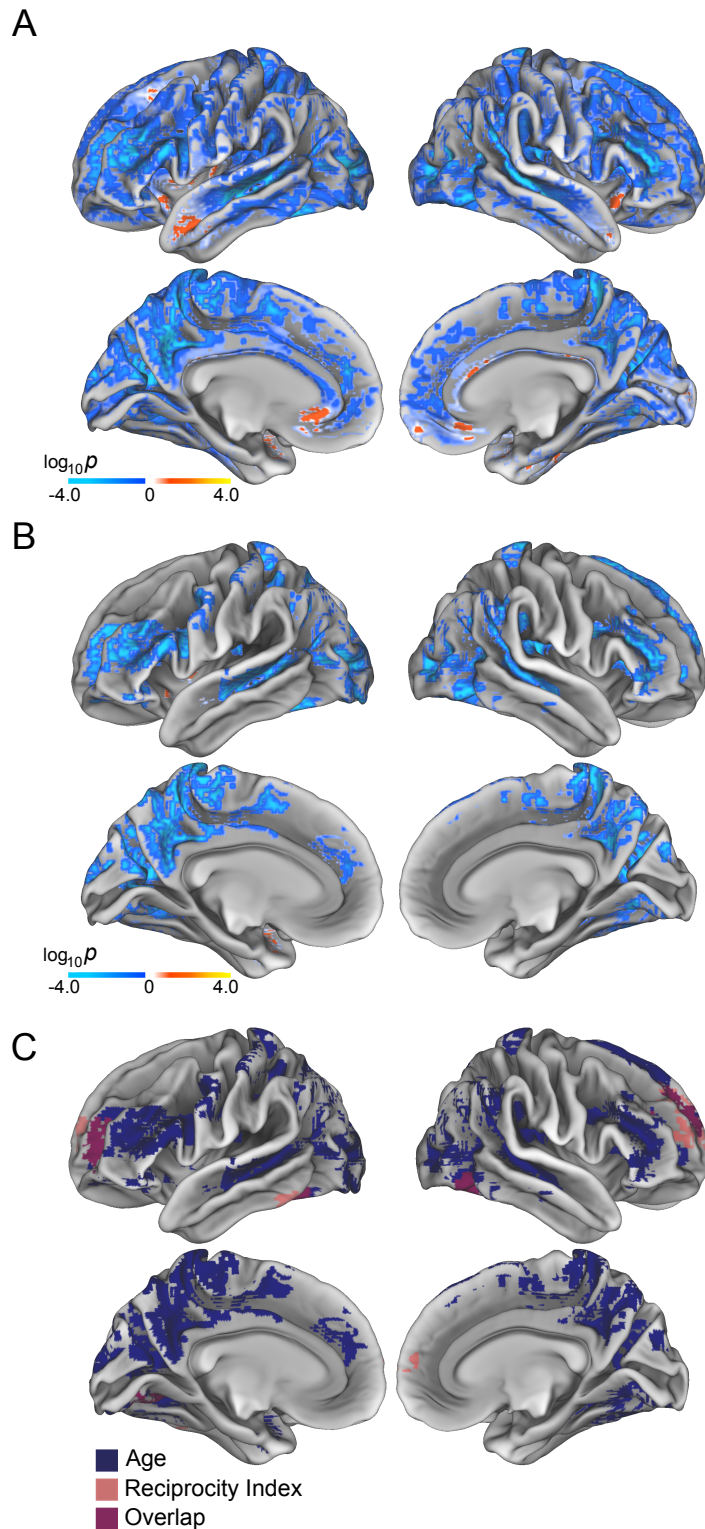

**Figure S2.** Fusiform gyrus and left lingual gyrus mediates relationship between age and Reciprocity model fit. Numbers next to the arrows indicate standardized beta coefficients, after controlling for the effect of sex and IQ. Indirect effect and direct effect CIs are the 95% confidence interval of the coefficients obtained from non-parametric bootstrap methods. \*\*  $p < 0.01$ .

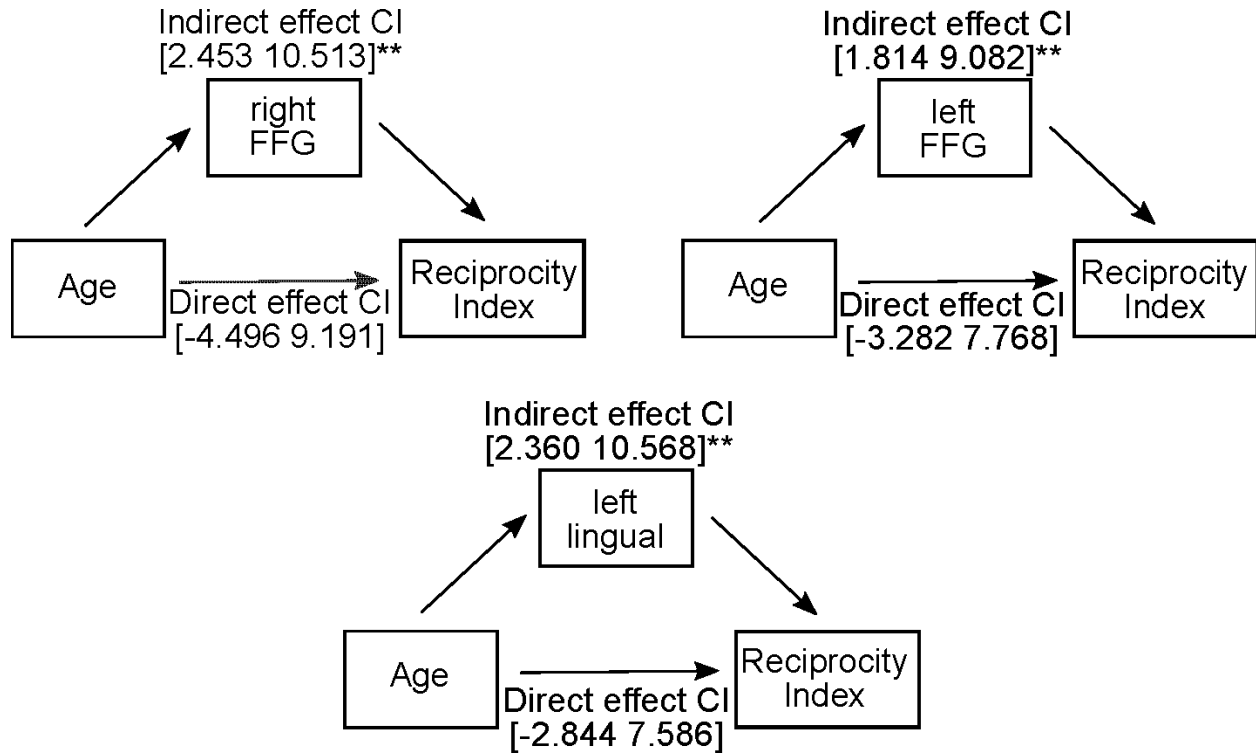

**Figure S3.** Scatter plots showing the relationships among age, thickness of the five ROIs, and reciprocity index.

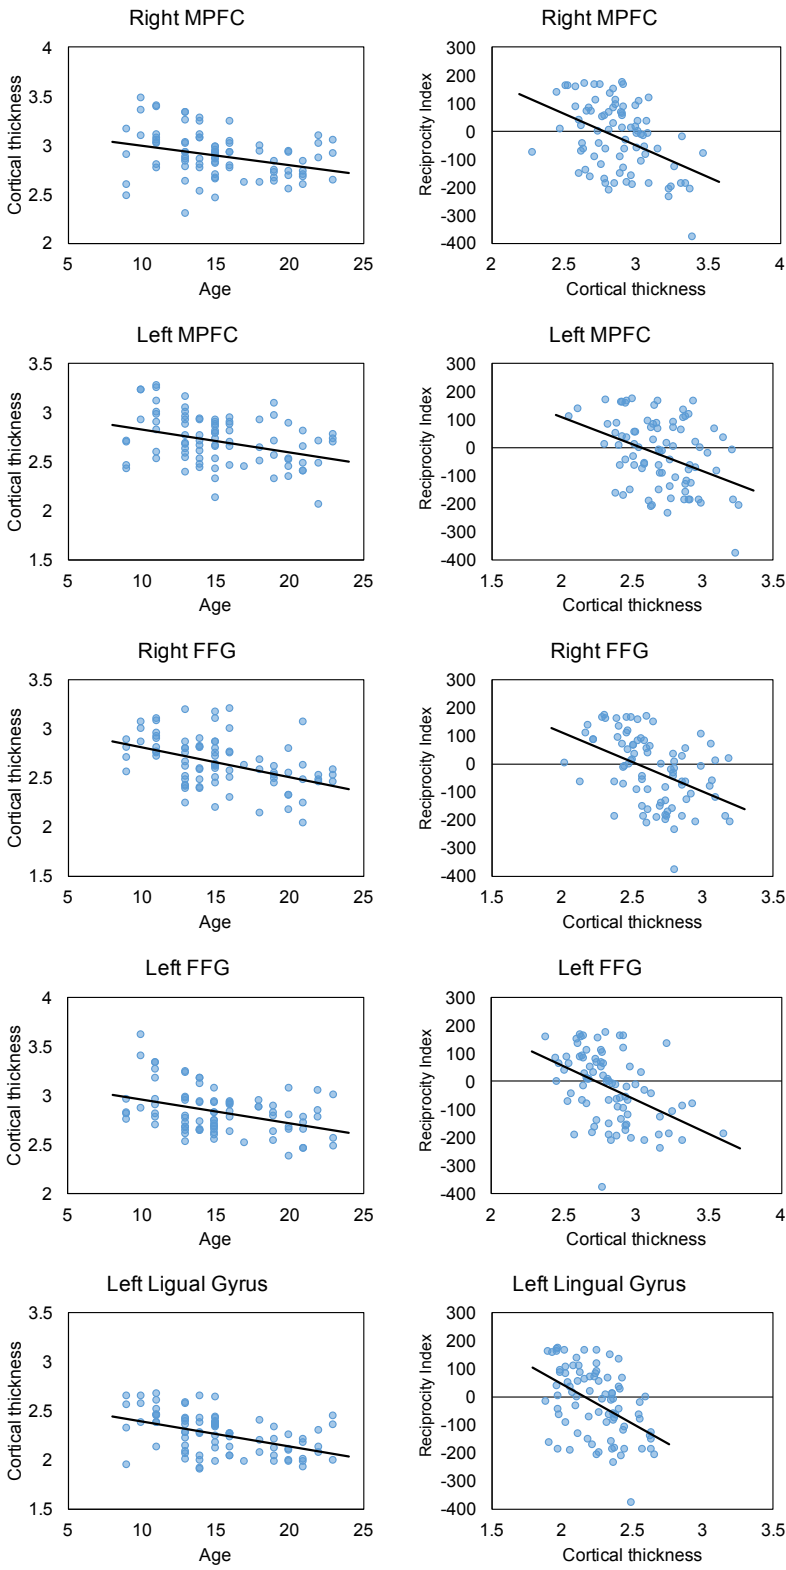

**Figure S4.** Word cloud of terms comprising social inference topic. Size and transparency of the words reflect the frequency.

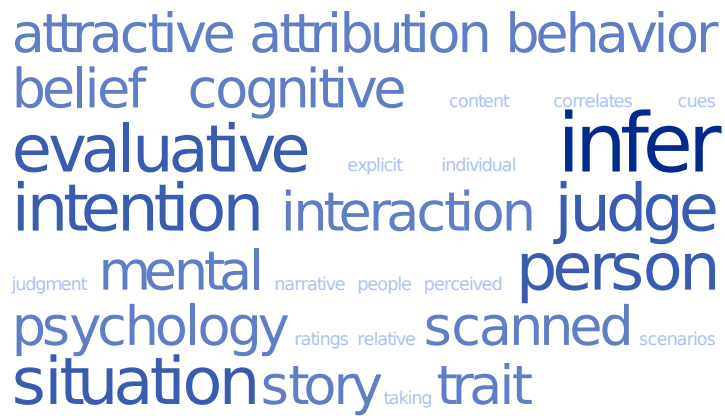

## Tables

**Table S1. Demographic information of the participants**

| Age group    | Mean age (SD) | Age range | Number of participants | Male | Female | Mean IQ (SD)   |
|--------------|---------------|-----------|------------------------|------|--------|----------------|
| Children     | 10.35 (0.86)  | 9-11 yrs  | 17                     | 11   | 6      | 113.62 (9.60)  |
| Adolescents  | 14.39 (1.08)  | 13-17 yrs | 46                     | 23   | 23     | 100.96 (12.89) |
| Young adults | 20.24 (1.69)  | 18-23 yrs | 25                     | 11   | 14     | 106.8 (12.24)  |

**Table S2. Experimental conditions and mean acceptance rate**

| Condition             | Options     | Offer | Number of trials | Mean acceptance rate (SD) |
|-----------------------|-------------|-------|------------------|---------------------------|
| No-alternative        | 7:3 vs. 7:3 | 7:3   | 21               | 0.73 (0.38)               |
|                       | 8:2 vs. 8:2 | 8:2   | 21               | 0.54 (0.41)               |
| Fair-alternative      | 7:3 vs. 5:5 | 7:3   | 21               | 0.31 (0.37)               |
|                       |             | 5:5   | 9                | 0.97 (0.12)               |
|                       | 8:2 vs. 5:5 | 8:2   | 21               | 0.08 (0.18)               |
|                       |             | 5:5   | 12               | 0.97 (0.09)               |
| Hyperfair-alternative | 7:3 vs. 3:7 | 7:3   | 21               | 0.37 (0.37)               |
|                       |             | 3:7   | 9                | 0.96 (0.10)               |
|                       | 8:2 vs. 2:8 | 8:2   | 21               | 0.13 (0.24)               |
|                       |             | 2:8   | 12               | 0.96 (0.10)               |

**Table S3. Model parameters estimated from the inequity aversion and reciprocity models**

| Model             | Parameters | Mean | Correlation with age (r) | Correlation with right MPFC thickness (r) | Correlation with left MPFC thickness (r) |
|-------------------|------------|------|--------------------------|-------------------------------------------|------------------------------------------|
| Inequity Aversion | Alpha      | 0.63 | -0.09                    | 0.12                                      | 0.19                                     |
|                   | Beta       | 0.24 | -0.01                    | 0.06                                      | 0.07                                     |
| Reciprocity       | Theta      | 0.67 | 0.08                     | -0.14                                     | -0.07                                    |



**Table S4. Model parameters estimated from the inequity aversion and reciprocity models with stochastic choices**

| Model             | Parameters       | Mean | Correlation with age (r) | Correlation with right MPFC thickness (r) | Correlation with left MPFC thickness (r) |
|-------------------|------------------|------|--------------------------|-------------------------------------------|------------------------------------------|
| Inequity Aversion | Alpha            | 0.68 | -0.06                    | 0.06                                      | 0.09                                     |
|                   | Beta             | 0.14 | -0.05                    | 0.07                                      | 0.17                                     |
|                   | Phi <sup>1</sup> | 0.73 | -0.03                    | 0.21                                      | 0.18                                     |
| Reciprocity       | Theta            | 0.74 | 0.00                     | -0.07                                     | -0.03                                    |
|                   | Phi <sup>1</sup> | 0.57 | 0.21                     | -0.32**                                   | -0.31**                                  |

<sup>1</sup> inverse temperature parameter of softmax function.

\*\* p < 0.01.

**Table S5. Brain regions negatively correlated with reciprocity index**

|                  | Cluster size<br>(mm <sup>2</sup> ) | MNI coordinates |     |     | cluster-wise<br>p-value |
|------------------|------------------------------------|-----------------|-----|-----|-------------------------|
|                  |                                    | X               | Y   | Z   |                         |
| R MPFC           | 1515.73                            | 18              | 47  | 33  | 0.0001                  |
| R Fusiform Gyrus | 680.25                             | 42              | -64 | -12 | 0.0365                  |
| L Lingual Gyrus  | 949.92                             | -19             | -70 | -11 | 0.0046                  |
| L Fusiform Gyrus | 733.07                             | -41             | -52 | -13 | 0.0205                  |
| L MPFC           | 1072.24                            | -21             | 58  | 8   | 0.0013                  |

**Table S6. Neurosynth meta-analytic decoding of reciprocity cortical thickness map**

| Rank | Topic                   | Topic Correlation | Topic Correlation p-value | Topic Rank p-value |
|------|-------------------------|-------------------|---------------------------|--------------------|
| 1    | Social inference        | -0.14             | 0*                        | 0*                 |
| 2    | Memory                  | -0.12             | 0*                        | 0*                 |
| 3    | Attention               | -0.11             | 0*                        | 0*                 |
| 4    | Emotion                 | -0.10             | 0*                        | 0*                 |
| 5    | Reward                  | -0.09             | 0*                        | 0*                 |
| 6    | Recognition             | -0.09             | 0*                        | 0*                 |
| 7    | Evaluation              | -0.07             | 0*                        | 0*                 |
| 8    | Anxiety                 | -0.06             | 0*                        | 0*                 |
| 9    | Spatial memory          | -0.06             | 0*                        | 0*                 |
| 10   | Object perception       | -0.05             | 0*                        | 0*                 |
| 11   | Episodic                | -0.05             | 0*                        | 0*                 |
| 12   | Priming                 | -0.05             | 0*                        | 0*                 |
| 13   | Social                  | -0.05             | 0*                        | 0*                 |
| 14   | Color                   | -0.03             | 0*                        | 0*                 |
| 15   | Anticipation            | -0.03             | 0.001*                    | 0.002*             |
| 16   | Eating                  | -0.03             | 0*                        | 0.004*             |
| 17   | Semantic                | -0.02             | 0.002*                    | 0.02               |
| 18   | Cognitive control       | -0.02             | 0.013*                    | 0.053              |
| 19   | Executive control       | -0.02             | 0.014*                    | 0.065              |
| 20   | Fear                    | -0.02             | 0.024*                    | 0.097              |
| 21   | Conflict                | -0.01             | 0.029                     | 0.119              |
| 22   | Error monitoring        | -0.01             | 0.048                     | 0.156              |
| 23   | Mental imagery          | -0.01             | 0.19                      | 0.299              |
| 24   | Categorical perception  | -0.01             | 0.234                     | 0.337              |
| 25   | Reading                 | 0.01              | 0.177                     | 0.666              |
| 26   | Abstract reasoning      | 0.01              | 0.055                     | 0.76               |
| 27   | Context                 | 0.02              | 0.017*                    | 0.82               |
| 28   | Language                | 0.03              | 0*                        | 0.933              |
| 29   | Autonomic               | 0.03              | 0*                        | 0.931              |
| 30   | Learning                | 0.03              | 0*                        | 0.934              |
| 31   | Motion                  | 0.04              | 0*                        | 0.951              |
| 32   | Eye movement            | 0.05              | 0*                        | 0.986              |
| 33   | Action                  | 0.08              | 0*                        | 0.998              |
| 34   | Language lateralization | 0.09              | 0*                        | 0.999              |
| 35   | Polymodal sensory       | 0.09              | 0*                        | 0.998              |
| 36   | Pain                    | 0.09              | 0*                        | 0.995              |
| 37   | Target detection        | 0.12              | 0*                        | 0.996              |
| 38   | Auditory                | 0.12              | 0*                        | 0.978              |
| 39   | Motor                   | 0.12              | 0*                        | 0.927              |
| 40   | Somatosensory           | 0.16              | 0*                        | 1                  |
| 41   | Music                   | 0.16              | 0*                        | 1                  |

\* significant using FDR  $q < 0.05$  correction.

**Table S7. Neurosynth meta-analytic decoding of age cortical thickness map**

| Rank | Topic                   | Topic Correlation | Topic Correlation p-value | Topic Rank p-value |
|------|-------------------------|-------------------|---------------------------|--------------------|
| 1    | Reading                 | -0.222645133      | 0*                        | 0*                 |
| 2    | Object perception       | -0.211806432      | 0*                        | 0*                 |
| 3    | Spatial memory          | -0.205708694      | 0*                        | 0*                 |
| 4    | Attention               | -0.200313145      | 0*                        | 0*                 |
| 5    | Motion                  | -0.166167188      | 0*                        | 0*                 |
| 6    | Mental imagery          | -0.157225463      | 0*                        | 0*                 |
| 7    | Memory                  | -0.156450231      | 0*                        | 0*                 |
| 8    | Executive control       | -0.138897451      | 0*                        | 0*                 |
| 9    | Categorical perception  | -0.136990315      | 0*                        | 0*                 |
| 10   | Color                   | -0.130740671      | 0*                        | 0*                 |
| 11   | Priming                 | -0.112213312      | 0*                        | 0*                 |
| 12   | Learning                | -0.106640736      | 0*                        | 0*                 |
| 13   | Recognition             | -0.096279371      | 0*                        | 0*                 |
| 14   | Semantic                | -0.088887417      | 0*                        | 0*                 |
| 15   | Action                  | -0.080928503      | 0*                        | 0.0004*            |
| 16   | Cognitive control       | -0.076682518      | 0*                        | 0.0036*            |
| 17   | Language                | -0.074247079      | 0*                        | 0.0071*            |
| 18   | Polymodal sensory       | -0.072768221      | 0*                        | 0.0169*            |
| 19   | Eye movement            | -0.069071945      | 0*                        | 0.0343             |
| 20   | Anticipation            | -0.060874163      | 0*                        | 0.1084             |
| 21   | Social inference        | -0.059903825      | 0*                        | 0.1288             |
| 22   | Language lateralization | -0.057306179      | 0*                        | 0.1685             |
| 23   | Abstract reasoning      | -0.031124545      | 0*                        | 0.6511             |
| 24   | Conflict                | -0.019294962      | 0.0069*                   | 0.8145             |
| 25   | Motor                   | -0.01759082       | 0.0112*                   | 0.8244             |
| 26   | Emotion                 | -0.008414429      | 0.14                      | 0.8944             |
| 27   | Social                  | 0.008048269       | 0.1525                    | 0.9657             |
| 28   | Auditory                | 0.011871857       | 0.0653                    | 0.9737             |
| 29   | Target detection        | 0.014128674       | 0.0359                    | 0.9679             |
| 30   | Context                 | 0.027444765       | 0.0004*                   | 0.9838             |
| 31   | Error monitoring        | 0.028340559       | 0.0002*                   | 0.9824             |
| 32   | Reward                  | 0.056387352       | 0*                        | 0.9961             |
| 33   | Somatosensory           | 0.058341068       | 0*                        | 0.9946             |
| 34   | Fear                    | 0.065735298       | 0*                        | 0.9944             |
| 35   | Episodic                | 0.074329039       | 0*                        | 0.9918             |
| 36   | Music                   | 0.07632704        | 0*                        | 0.9848             |
| 37   | Eating                  | 0.091785663       | 0*                        | 0.9802             |
| 38   | Anxiety                 | 0.108635113       | 0*                        | 0.9683             |
| 39   | Evaluation              | 0.121061793       | 0*                        | 0.9268             |
| 40   | Autonomic               | 0.20486075        | 0*                        | 1                  |
| 41   | Pain                    | 0.223064454       | 0*                        | 1                  |

\* significant using FDR  $q < 0.05$  correction.
